# Supplementary material
Source: PubMed Central journal article supplement (PMC4221378)
Supplement: supp_the2014-0305_Heo-14-305.pdf [file supp_the2014-0305_Heo-14-305.pdf]

## Overview

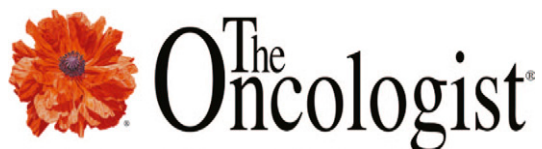

The official journal of the Society for Translational Oncology

**First Published Online October 3, 2014**

**DOI:** 10.1634/theoncologist.2014-0305

**Title:** A Phase II Study of Ifosfamide, Methotrexate, Etoposide, and Prednisolone for Previously Untreated Stage I/II Extranodal Natural Killer/T-Cell Lymphoma, Nasal Type: A Multicenter Trial of the Korean Cancer Study Group

**Authors:** Tae Min Kim,<sup>a</sup> Dong-Wan Kim,<sup>a</sup> Yoon-Koo Kang,<sup>b</sup> Jooseop Chung,<sup>c</sup> Hong-Suk Song,<sup>d</sup> Hyo Jung Kim,<sup>e</sup> Byung Soo Kim,<sup>f</sup> Jong-Seok Lee,<sup>g</sup> Hawk Kim,<sup>h</sup> Sung Hyun Yang,<sup>i</sup> Young Jin Yuh,<sup>j</sup> Sung Hwa Bae,<sup>k</sup> Myung Soo Hyun,<sup>l</sup> Yoon Kyung Jeon,<sup>a</sup> Chul Woo Kim,<sup>a</sup> Dae Seog Heo<sup>a</sup>

<sup>a</sup>Seoul National University Hospital, Seoul, Republic of Korea; <sup>b</sup>Asan Medical Center, University of Ulsan College of Medicine, Seoul, Republic of Korea; <sup>c</sup>Pusan National University Hospital, Busan, Republic of Korea; <sup>d</sup>Keimyung University Dongsan Medical Center, Daegu, Republic of Korea; <sup>e</sup>Hallym University Sacred Heart Hospital, Seoul, Republic of Korea; <sup>f</sup>Korea University Medical Center, Seoul, Republic of Korea; <sup>g</sup>Seoul National University Bundang Hospital, Gyeonggi-do, Republic of Korea; <sup>h</sup>Ulsan University Hospital, Ulsan, Republic of Korea; <sup>i</sup>Korea Cancer Center Hospital, Seoul, Republic of Korea; <sup>j</sup>Inje University Sanggye Paik Hospital, Seoul, Republic of Korea; <sup>k</sup>Daegu Catholic University Medical Center, Daegu, Republic of Korea; <sup>l</sup>Yeungnam University College of Medicine, Daegu, Republic of Korea

**Trial Registry:** Korean Cancer Study Group: KCSG LY04-03

**Sponsor(s):** Seoul National University Hospital

**Principal Investigator:** Dae Seog Heo

**IRB Approved:** Yes

### Disclosures

The authors indicated no financial relationships.

## Author Summary: Abstract and Brief Discussion

### Background

Combination chemotherapy consisting of ifosfamide, methotrexate, etoposide, and prednisolone (IMEP) was active as first-line and second-line treatment for extranodal natural killer/T-cell lymphoma (NTCL).

### Methods

Forty-four patients with chemo-naïve stage I/II NTCL were enrolled in a prospective, multicenter, phase II study and received six cycles of IMEP (ifosfamide 1.5 g/m<sup>2</sup> on days 1–3; methotrexate 30 mg/m<sup>2</sup> on days 3 and 10; etoposide 100 mg/m<sup>2</sup> on days 1–3; and prednisolone 60 mg/m<sup>2</sup> per day on days 1–5) followed by involved field radiotherapy (IFRT).

### Results

Overall response rates were 73% (complete remission [CR] in 11 of 41 evaluable patients [27%]) after IMEP chemotherapy and 78% (CR 18 of 27 evaluable patients [67%]) after IMEP followed by IFRT. Neutropenia and thrombocytopenia were documented in 33 patients (75%) and 7 patients (16%), respectively. Only 8 patients (18%) experienced febrile neutropenia. Three-year progression-free survival (PFS) and overall survival (OS) were 66% and 56%, respectively. High Ki-67 (≥70%) and Ann Arbor stage II independently reduced PFS ( $p = .004$ ) and OS ( $p = .001$ ), respectively.

## Conclusion

Due to the high rate of progression during IMEP chemotherapy, IFRT needs to be introduced earlier. Moreover, active chemotherapy including an L-asparaginase-based regimen should be used to reduce systemic treatment failure in stage I/II NTCL.

## Discussion

Our trial was based on the scheme of chemotherapy followed by radiotherapy (sequential). However, other trials used concurrent chemoradiation followed by ifosfamide plus etoposide-based combination chemotherapy [4, 5]. Although the designs of two concurrent chemoradiation trials [4, 5] were very similar, large differences were observed regarding survival data. We chose the JCOG0211 study [4] for comparison with our data because the other study provided limited information on patterns of failure due to short-term follow-up [5]. Our study showed a relatively higher locoregional failure rate (18% vs. 4%) but lower rates of systemic failure than in the JCOG0211 study (14% vs. 33%). These data suggest that upfront chemoradiation is favorable for locoregional control, but it is unfavorable for systemic failure in stage I/II natural killer/T-cell lymphoma (NTCL). Extended chemotherapy of up to six cycles in our study might be a factor for the high incidence of locoregional failure. Better coordination of the sequence between chemotherapy and radiotherapy might reduce both locoregional and systemic failures. A reduced number of cycles of chemotherapy, for example, followed by involved field radiotherapy (IFRT), concurrent chemoradiation, or sandwich radiotherapy during chemotherapy may be more efficacious for untreated stage I/II NTCL. Considering that the planned doses were reduced for 11 patients (25%) in 35 of 229 cycles (15%) in our study, the ifosfamide, methotrexate, etoposide, and prednisolone (IMEP) regimen was safe and relatively well tolerated.

Recently, regimens based on L-asparaginase (L-asp) have shown promising efficacy in patients with refractory/relapsed or newly diagnosed advanced NTCL (overall response rate of 78%–81% and complete response [CR] of 45%–66%) [6–8] and with untreated stage I/II NTCL (CR of 90%, 2-year overall survival [OS] of 88%, and 2-year progress-free survival [PFS] of 90%) [10]. Furthermore, gemcitabine, which is active against NTCL [11], plus oxaliplatin and L-asp followed by IFRT resulted in a CR rate of 74% and 2-year PFS of 86% in stage I/II upper aerodigestive tract NTCL [12]. Furthermore, sandwich L-asp, vincristine, and prednisolone chemotherapy with IFRT showed a promising outcome (2-year OS of 88.5% and 2-year PFS of 80.6%) [13]. Consequently, more active L-asp-based regimens should be introduced in patients with stage I/II NTCL.

The IMEP regimen is effective and safe in patients with stage I/II NTCL before the introduction of L-asp, and IMEP followed by IFRT resulted in improved treatment outcomes in localized NTCL (Table 1). However, a short-course of the L-asp-based regimen followed by IFRT or concurrent or sandwich radiation with an L-asp-based regimen should be introduced in patients with untreated stage I/II NTCL.

## Trial Information

|                                                        |                                                    |
|--------------------------------------------------------|----------------------------------------------------|
| <b>Disease</b>                                         | Lymphoma – Non-Hodgkin                             |
| <b>Stage of disease / treatment</b>                    | Primary                                            |
| <b>Prior Therapy</b>                                   | None                                               |
| <b>Type of study - 1</b>                               | Phase II                                           |
| <b>Type of study - 2</b>                               | Single Arm                                         |
| <b>Primary Endpoint</b>                                | Overall Response Rate                              |
| <b>Secondary Endpoint</b>                              | Complete response rate                             |
| <b>Secondary Endpoint</b>                              | Progression-free survival                          |
| <b>Secondary Endpoint</b>                              | Overall Survival                                   |
| <b>Additional Details of Endpoints or Study Design</b> | Toxicities                                         |
| <b>Investigator's Analysis</b>                         | Active but results overtaken by other developments |

## Drug Information

|                             |                      |
|-----------------------------|----------------------|
| <b>Drug 1</b>               |                      |
| <b>Generic/Working name</b> | Ifosfamide           |
| <b>Drug class</b>           | Alkylating agent     |
| <b>Dose</b>                 | 1.5 g/m <sup>2</sup> |
| <b>Route</b>                | IV                   |

|                            |                      |
|----------------------------|----------------------|
| Schedule of Administration | Days 1–3             |
| <b>Drug 2</b>              |                      |
| Generic/Working name       | Methotrexate         |
| Drug class                 | Antimetabolite       |
| Dose                       | 30 g/m <sup>2</sup>  |
| Route                      | IV                   |
| Schedule of Administration | Days on 3 and 10     |
| <b>Drug 3</b>              |                      |
| Generic/Working name       | Etoposide            |
| Drug class                 | Topoisomerase II     |
| Dose                       | 100 g/m <sup>2</sup> |
| Route                      | IV                   |
| Schedule of Administration | Days 1–3             |
| <b>Drug 4</b>              |                      |
| Generic/Working name       | Prednisolone         |
| Drug class                 | Other                |
| Dose                       | 60 g/m <sup>2</sup>  |
| Route                      | Oral (po)            |
| Schedule of Administration | Days 1–5             |

## Patient Characteristics

|                                     |                                                       |
|-------------------------------------|-------------------------------------------------------|
| Number of patients, male            | 29                                                    |
| Number of patients, female          | 15                                                    |
| Stage                               | Ann Arbor stage I/II                                  |
| Age                                 | Median (range): 56 years (range, 21–70 years)         |
| Number of prior systemic therapies  | Median (range): 0                                     |
| Performance Status:                 | ECOG<br>0 — 15<br>1 — 28<br>2 — 1<br>3 —<br>unknown — |
| Other                               | Not Collected                                         |
| Cancer Types or Histologic Subtypes |                                                       |

## Primary Assessment Method

### Experimental Arm: Total Patient Population

|                                            |       |
|--------------------------------------------|-------|
| Number of patients screened:               | 48    |
| Number of patients enrolled:               | 44    |
| Number of patients evaluable for toxicity: | 44    |
| Number of patients evaluated for efficacy: | 41    |
| Evaluation method:                         | Other |
| Response assessment CR:                    | 26%   |
| Response assessment PR:                    | 47%   |
| Response assessment SD:                    | 18%   |
| Response assessment PD:                    | 9%    |
| Response assessment other:                 | 0%    |
| (Median) duration assessments PFS:         | 66%   |
| (Median) duration assessments OS:          | 56%   |

## Adverse Events

| Name                                                                                                                                         | *NC/NA | 1   | 2   | 3   | 4   | 5  | All Grades |
|----------------------------------------------------------------------------------------------------------------------------------------------|--------|-----|-----|-----|-----|----|------------|
| Hemoglobin                                                                                                                                   | 7%     | 43% | 29% | 16% | 5%  | 0% | 93%        |
| Leukocytes (total WBC)                                                                                                                       | 7%     | 14% | 23% | 36% | 20% | 0% | 93%        |
| Neutrophils/granulocytes (ANC/AGC)                                                                                                           | 11%    | 2%  | 12% | 30% | 45% | 0% | 89%        |
| Platelets                                                                                                                                    | 57%    | 18% | 9%  | 5%  | 11% | 0% | 43%        |
| Febrile neutropenia (fever of unknown origin without clinically or microbiologically documented infection)(ANC <1.0 × 10e9/L, fever ≥38.5°C) | 82%    | 0%  | 0%  | 18% | 0%  | 0% | 18%        |
| Nausea                                                                                                                                       | 27%    | 68% | 5%  | 0%  | 0%  | 0% | 73%        |
| Vomiting                                                                                                                                     | 84%    | 14% | 2%  | 0%  | 0%  | 0% | 16%        |
| Mucositis/stomatitis (clinical exam)                                                                                                         | 61%    | 30% | 9%  | 0%  | 0%  | 0% | 39%        |
| Diarrhea                                                                                                                                     | 89%    | 11% | 0%  | 0%  | 0%  | 0% | 11%        |
| Constipation                                                                                                                                 | 64%    | 34% | 2%  | 0%  | 0%  | 0% | 36%        |
| Neuropathy: sensory                                                                                                                          | 91%    | 7%  | 2%  | 0%  | 0%  | 0% | 9%         |
| Bilirubin (hyperbilirubinemia)                                                                                                               | 82%    | 7%  | 9%  | 2%  | 0%  | 0% | 18%        |
| Creatinine                                                                                                                                   | 95%    | 5%  | 0%  | 0%  | 0%  | 0% | 5%         |

\*No Change from Baseline/No Adverse Event

## Pharmacokinetics/Pharmacodynamics

|                                |                                                                        |
|--------------------------------|------------------------------------------------------------------------|
| <b>N:</b>                      | 13                                                                     |
| <b>Cmax:</b>                   | Not collected                                                          |
| <b>AUC:</b>                    | Not collected                                                          |
| <b>Half-life:</b>              | Not collected                                                          |
| <b>Volume of distribution:</b> | Not collected                                                          |
| <b>Clearance:</b>              | Not collected                                                          |
| <b>Notes:</b>                  | Bone marrow Epstein-Barr virus was positive in 4 of 13 patients (31%). |

## Assessment, Analysis, and Discussion

|                                             |                                                    |
|---------------------------------------------|----------------------------------------------------|
| <b>Completion:</b>                          | Study completed                                    |
| <b>Pharmacokinetics / Pharmacodynamics:</b> | Not Collected                                      |
| <b>Investigator's Assessment:</b>           | Active but results overtaken by other developments |

### Discussion

A nationwide survey of the Korean Cancer Study Group revealed the clinical heterogeneity of natural killer/T-cell lymphoma (NTCL) and revealed two subsets based on clinical presentation: upper aerodigestive tract (UAT) and non-UAT NTCLs [1]. Nearly 90% of patients showed UAT presentation at Ann Arbor stage I/II NTCL, and 2-year overall survival (OS) and progression-free survival (PFS) were 60% and 45%, respectively. Systemic failure was observed in 25% of stage I/II NTCL patients treated with radiotherapy alone [2]. Combined chemotherapy and radiotherapy has been administered to improve treatment outcomes in localized NTCL [1, 3].

Like other recent clinical trials, our trial was based on etoposide-based combination chemotherapy because of poor outcomes observed with anthracycline-based combination chemotherapy. One of the key issues determined was the timing of radiotherapy. Our trial was based on the scheme of chemotherapy followed by radiotherapy (sequential). However, other trials used concurrent chemoradiation followed by ifosfamide plus etoposide-based combination chemotherapy [4, 5]. Although the designs of two concurrent chemoradiation trials [4, 5] were very similar, large differences were observed regarding survival data. We chose the JCOG0211 study [4] for comparison with our data because the other study provided limited information on patterns of failure due to short-term follow-up [5]. Our study showed a relatively higher locoregional failure rate (18% vs. 4%) but lower rates of systemic failure than in the JCOG0211 study (14% vs. 33%). These data suggest that upfront chemoradiation is favorable for locoregional control, but it is unfavorable for systemic failure in stage I/II NTCL.

Extended chemotherapy of up to six cycles in our study might be a factor for the high incidence of locoregional failure. Better coordination of the sequence between chemotherapy and radiotherapy might reduce both locoregional and systemic failures. A reduced number of cycles of chemotherapy, for example, followed by involved field radiotherapy (IFRT), concurrent chemoradiation, or sandwich radiotherapy during chemotherapy may be more efficacious for untreated stage I/II NTCL. Considering that the planned doses were reduced for 11 patients (25%) in 35 of 229 cycles (15%) in our study, the ifosfamide, methotrexate, etoposide, and prednisolone (IMEP) regimen was safe and relatively well tolerated.

A wide variety of survival outcomes are possible in stage I/II NTCL, probably because of the heterogeneity of the patient population. Systemic symptoms were more frequently observed in our patients (75%) than in other studies (37%) [4, 5]. In addition, despite the low number of patients tested for bone marrow Epstein-Barr virus (EBV) status, detection of nuclear EBV oligonucleotide in bone marrow was observed in 31% of our patients and might be associated with advanced disease and high early failure rates and thus a rapid drop in the 1-year survival curve. This early drop (within 1 year) in the survival curve was also observed in JCOG0211 patients who did not achieve complete response (CR) after concurrent chemoradiation [4].

Recently, regimens based on L-asparaginase (L-asp) have shown promising efficacy (overall response rate of 78%–81% and CR of 45%–66%) in refractory/relapsed or newly diagnosed advanced NTCL [6–8]. In addition, IMEP plus L-asp showed similar outcomes with favorable safety profiles, like other L-asp-based regimens, and significantly improved survival in untreated stage III/IV NTCL compared with chemotherapy without L-asp [9]. Similarly, a high CR rate and excellent survival outcomes (CR of 90%, 2-year OS of 88%, and 2-year PFS of 90%) were observed in patients with stage I/II NTCL treated with CHOP (cyclophosphamide, doxorubicin, vincristine, and prednisone) plus L-asp followed by IFRT [10]. Furthermore, gemcitabine, which is active against NTCL [11], plus oxaliplatin and L-asp (GELOX) followed by IFRT resulted in a CR rate of 74% and 2-year PFS of 86% in stage I/II UAT-NTCL [12]. Furthermore, sandwich L-asp, vincristine, and prednisolone (LVP) chemotherapy with IFRT showed a promising outcome (2-year OS of 88.5% and 2-year PFS of 80.6%) [13]. Due to the higher toxicities of the SMILE regimen (steroid [dexamethasone], methotrexate, ifosfamide, L-asparaginase, and etoposide), less toxic regimens such as IMEP plus L-asp [9], dose-modified SMILE [14], GELOX [12], and LVP [13] might be ideal options before IFRT or concurrent or sandwich chemoradiation in patients with untreated stage I/II NTCL. Considering that almost all patients with early failure did not survive more than 1 year in this study, more active and less toxic L-asp-based regimens should be investigated further in patients with stage I/II NTCL.

A high Ki-67 index was predictive of reduced PFS in our study, in line with previous reports [3, 15]. In addition, Ann Arbor stage II was independently correlated with reduced OS in stage I/II NTCL, suggesting that regional lymphadenopathy might adversely affect survival [1]. EBV-positive bone marrow was demonstrated in 15.4% of patients with stage I/II NTCL and these patients had lower survival than patients whose bone marrow was EBV negative [16]. Similarly, 31% of our patients who were EBV positive in the bone marrow trended toward reduced OS; however, it is unknown whether EBV-encoded RNA1 is present in lymphoma cells or in bystander, nonlymphoma cells in these bone marrow samples. Consequently, we are cautious about including stage I/II NTCL patients with bone marrow EBV positivity in the analysis of prospective trials for localized NTCL.

In conclusion, the IMEP regimen is effective and safe in patients with stage I/II NTCL before the introduction of L-asp, and IMEP followed by IFRT resulted in improved treatment outcomes in localized NTCL. Considering the high efficacy of the L-asp-based regimen, a short course of the L-asp-based regimen followed by IFRT or concurrent or sandwich radiation with an L-asp-based regimen should be introduced in patients with untreated stage I/II NTCL. The rational selection of L-asp-based combination chemotherapy and a well-coordinated sequence of radiotherapy should be determined in a future trial.

## Acknowledgments

This study was supported by a grant from the Innovative Research Institute for Cell Therapy, Republic of Korea (A062260). We thank Min Young Son at the KCSG data center for collecting data from each participating center. We also thank all investigators and participants.

## References

1. Kim TM, Lee SY, Jeon YK et al. Clinical heterogeneity of extranodal NK/T-cell lymphoma, nasal type: A national survey of the Korean Cancer Study Group. *Ann Oncol* 2008;19:1477–1484.
2. Kim GE, Cho JH, Yang WI et al. Angiocentric lymphoma of the head and neck: Patterns of systemic failure after radiation treatment. *J Clin Oncol* 2000;18:54–63.
3. Au WY, Weisenburger DD, Intragumtornchai T et al. Clinical differences between nasal and extranasal natural killer/T-cell lymphoma: a study of 136 cases from the International Peripheral T-Cell Lymphoma Project. *Blood* 2009;113:3931–3937.
4. Yamaguchi M, Tobinai K, Oguchi M et al. Phase I/II study of concurrent chemoradiotherapy for localized nasal natural killer/T-cell lymphoma: Japan Clinical Oncology Group Study JCOG0211. *J Clin Oncol* 2009;27:5594–5600.

5. Kim SJ, Kim K, Kim BS et al. Phase II trial of concurrent radiation and weekly cisplatin followed by VIPD chemotherapy in newly diagnosed, stage IE to IIE, nasal, extranodal NK/T-Cell Lymphoma: Consortium for Improving Survival of Lymphoma study. *J Clin Oncol* 2009;27:6027–6032.
6. Yamaguchi M, Kwong YL, Kim WS et al. Phase II study of SMILE chemotherapy for newly diagnosed stage IV, relapsed, or refractory extranodal natural killer (NK)/T-cell lymphoma, nasal type: The NK-Cell Tumor Study Group study. *J Clin Oncol* 2011;29:4410–4416.
7. Kwong YL, Kim WS, Lim ST et al. SMILE for natural killer/T-cell lymphoma: Analysis of safety and efficacy from the Asia Lymphoma Study Group. *Blood* 2012;120:2973–2980.
8. Jaccard A, Gachard N, Marin B et al. Efficacy of L-asparaginase with methotrexate and dexamethasone (AspaMetDex regimen) in patients with refractory or relapsing extranodal NK/T-cell lymphoma, a phase 2 study. *Blood* 2011;117:1834–1839.
9. Kim M, Kim KH, Keam B et al. Ifosfamide, methotrexate, etoposide, and prednisolone (IMEP) plus l-asparaginase as a first-line therapy improves outcomes in stage III/IV NK/T-cell lymphoma, nasal type (NTCL). Poster 4347 presented at: American Society of Hematology annual meeting; December 7–10, 2013; New Orleans, LA.
10. Lin N, Song Y, Zheng W et al. A prospective phase II study of L-asparaginase- CHOP plus radiation in newly diagnosed extranodal NK/T-cell lymphoma, nasal type. *J Hematol Oncol* 2013;6:44.
11. Kim TM, Kim S, Ahn YO et al. Anti-cancer activity of gemcitabine against natural killer cell leukemia/lymphoma. *Leuk Lymphoma* 2014;55: 940–943.
12. Wang L, Wang ZH, Chen XQ et al. First-line combination of gemcitabine, oxaliplatin, and L-asparaginase (GELOX) followed by involved-field radiation therapy for patients with stage IE/IIE extranodal natural killer/T-cell lymphoma. *Cancer* 2013;119:348–355.
13. Jiang M, Zhang H, Jiang Y et al. Phase 2 trial of “sandwich” L-asparaginase, vincristine, and prednisone chemotherapy with radiotherapy in newly diagnosed, stage IE to IIE, nasal type, extranodal natural killer/T-cell lymphoma. *Cancer* 2012;118:3294–3301.
14. Yang L, Liu H, Xu XH et al. Retrospective study of modified SMILE chemotherapy for advanced-stage, relapsed, or refractory extranodal natural killer (NK)/T cell lymphoma, nasal type. *Med Oncol* 2013;30:720.
15. Kim SJ, Kim BS, Choi CW et al. Ki-67 expression is predictive of prognosis in patients with stage I/II extranodal NK/T-cell lymphoma, nasal type. *Ann Oncol* 2007;18:1382–1387.
16. Lee J, Suh C, Huh J et al. Effect of positive bone marrow EBV in situ hybridization in staging and survival of localized extranodal natural killer/ T-cell lymphoma, nasal-type. *Clin Cancer Res* 2007;13:3250–3254.

## Figures and Tables

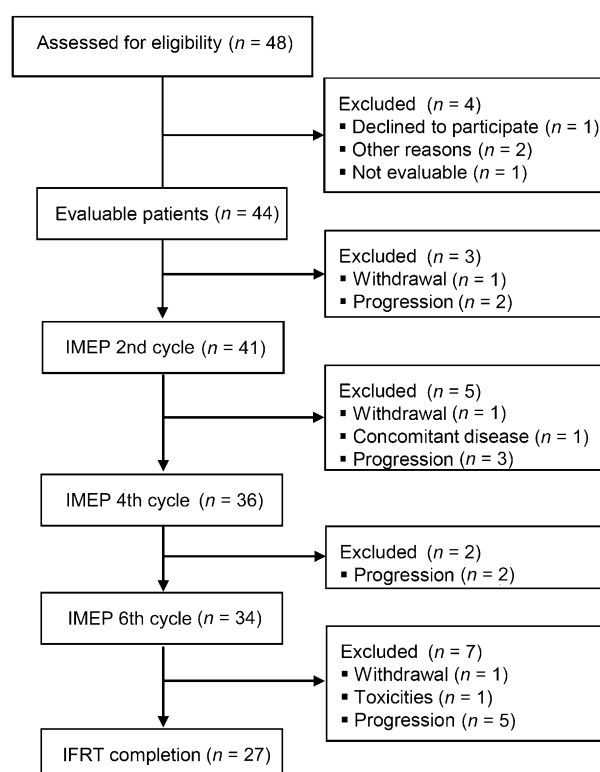

**Figure 1.** Flow diagram for eligible patients at each point of treatment.

Abbreviations: IFRT, involved field radiotherapy; IMEP, ifosfamide, methotrexate, etoposide, and prednisolone.

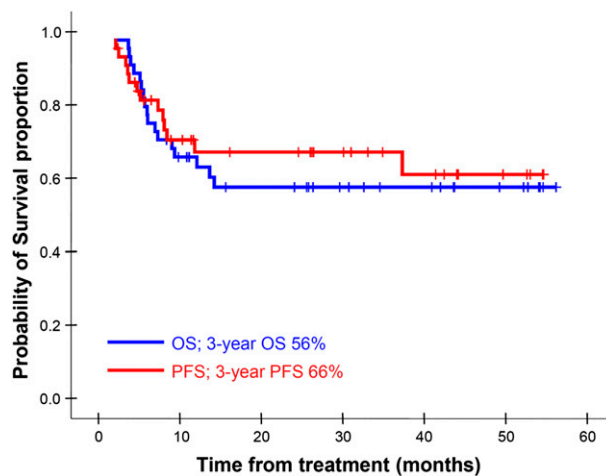

**Figure 2.** Kaplan-Meier plot for survival.  
Abbreviations: OS, overall survival; PFS, progression-free survival.

**Table 1.** Patient characteristics

| Characteristic                            | <i>n</i> | %  |
|-------------------------------------------|----------|----|
| Age                                       |          |    |
| ≤60 years                                 | 31       | 70 |
| >60 years                                 | 13       | 30 |
| Presentations of tumor                    |          |    |
| Nasal cavity                              | 35       | 80 |
| Nasopharynx                               | 8        | 18 |
| Oropharynx                                | 3        | 7  |
| Presence of B symptoms                    |          |    |
| No                                        | 11       | 25 |
| Yes                                       | 33       | 75 |
| Ann Arbor stage                           |          |    |
| IE                                        | 32       | 73 |
| IIE                                       | 12       | 27 |
| Performance status                        |          |    |
| 0                                         | 15       | 34 |
| 1                                         | 28       | 64 |
| 2                                         | 1        | 2  |
| LDH level                                 |          |    |
| Normal                                    | 29       | 71 |
| Elevated                                  | 12       | 29 |
| Number of extranodal sites                |          |    |
| 0–1                                       | 39       | 89 |
| ≥2                                        | 5        | 11 |
| Tumor extent of involvements              |          |    |
| Single anatomic site                      | 25       | 57 |
| Spread to adjacent structures             | 15       | 34 |
| Bony invasion with or without destruction | 4        | 9  |
| Ki-67 index                               |          |    |
| <70%                                      | 26       | 68 |
| ≥70%                                      | 12       | 32 |

|                                     |    |    |
|-------------------------------------|----|----|
| IPI score                           |    |    |
| 0                                   | 19 | 43 |
| 1                                   | 16 | 36 |
| 2                                   | 9  | 21 |
| NK/T-cell lymphoma prognostic index |    |    |
| 1                                   | 3  | 7  |
| 2                                   | 22 | 54 |
| 3                                   | 15 | 37 |
| 4                                   | 1  | 2  |

Abbreviations: IPI, International Prognostic Index; LDH, lactate dehydrogenase; NK/T-cell, natural killer/T-cell.

**Table 2.** Treatment outcomes after completion of each treatment

| Response | 2nd cycle (n = 41) | 4th cycle (n = 36) | 6th cycle (n = 34) | IFRT (n = 27) |
|----------|--------------------|--------------------|--------------------|---------------|
| CR       | 7 (17)             | 9 (25)             | 9 (26)             | 18 (67)       |
| PR       | 18 (44)            | 15 (42)            | 16 (47)            | 3 (11)        |
| SD       | 14 (34)            | 9 (25)             | 6 (18)             | 2 (7)         |
| PD       | 2 (5)              | 3 (8)              | 3 (9)              | 4 (15)        |
| ORR, %   | 61                 | 67                 | 73                 | 78            |

Data are shown as n (%) unless specified otherwise.

Abbreviations: CR, complete response; IFRT, involved field radiotherapy; ORR, overall response rate; PD, progressive disease; PR, partial response; SD, stable disease.

**Table 3.** Patterns of failure

| ID | Age, years/<br>sex | Local invasion | Stage | Treatments | Overall responses |      |             |                          | Failure sites             | Survivals, months |       |
|----|--------------------|----------------|-------|------------|-------------------|------|-------------|--------------------------|---------------------------|-------------------|-------|
|    |                    |                |       |            | IMEP              | IFRT | Failures    | Patterns                 |                           | PFS               | OS    |
| 1  | 62/M               | Adjacent       | IB    | IMEP4/IFRT | PR→PD             | NE   | Progression | Locoregional             | Nasal cavity              | 2.83              | 7.30  |
| 2  | 39/M               | Adjacent       | IIA   | IMEP6/IFRT | CR                | PD   | Relapse     | Systemic                 | Lung                      | 7.40              | 54.60 |
| 8  | 42/M               | Single         | IB    | IMEP6/IFRT | PR                | CR   | Relapse     | Locoregional             | Nasal cavity              | 36.83             | 56.20 |
| 10 | 65/M               | Single         | IB    | IMEP2      | PD                | NE   | Progression | Locoregional             | Nasal cavity              | 1.47              | 6.07  |
| 18 | 58/M               | Adjacent       | IIA   | IMEP6/IFRT | PR                | PD   | Progression | Locoregional             | Lymph node                | 7.90              | 12.10 |
| 21 | 52/F               | Single         | IB    | IMEP2      | PD                | NE   | Progression | Locoregional             | Nasal cavity, nasopharynx | 1.60              | 5.13  |
| 23 | 55/M               | Bony           | IA    | IMEP6/IFRT | SD                | PD   | Progression | Locoregional<br>Systemic | Nasal cavity, liver       | 6.80              | 6.97  |
| 28 | 64/F               | Single         | IB    | IMEP6/IFRT | PR                | CR   | Relapse     | Systemic                 | Breast, lymph node        | 11.30             | 13.67 |
| 29 | 31/M               | Single         | IB    | IMEP6      | CR→PD             | NE   | Progression | Systemic                 | Stomach                   | 4.63              | 14.23 |
| 33 | 59/M               | Single         | IB    | IMEP4      | SD→PD             | NE   | Progression | Locoregional             | Nasal cavity              | 3.23              | 9.03  |
| 34 | 49/M               | Adjacent       | IIA   | IMEP1      | PD                | NE   | Progression | Locoregional             | Nasal cavity, nasopharynx | 1.97              | 3.80  |
| 35 | 70/M               | Single         | IIB   | IMEP6/IFRT | PR                | PD   | Progression | Locoregional             | Lymph node                | 7.57              | 9.37  |
| 36 | 66/F               | Bony           | IIA   | IMEP6      | SD→PD             | NE   | Progression | Systemic                 | Spleen                    | 4.23              | 5.57  |
| 41 | 46/F               | Adjacent       | IB    | IMEP4      | CR→PD             | NE   | Progression | Systemic                 | CSF, pleura, peritoneum   | 3.07              | 3.70  |

Abbreviations: CR, complete response; F, female; ID, patient identifier; IFRT, involved field radiotherapy; IMEP, ifosfamide, methotrexate, etoposide, and prednisolone; M, male; NE, not evaluable; ORR, overall response rate; OS, overall survival; PD, progressive disease; PFS, progress-free survival; PR, partial response; SD, stable disease.



**Table 4.** Univariate and multivariate analyses for survivals

| Predictors            | PFS      |     |          | OS       |     |          |
|-----------------------|----------|-----|----------|----------|-----|----------|
|                       | <i>p</i> | HR  | 95% CI   | <i>p</i> | HR  | 95% CI   |
| Univariate analysis   |          |     |          |          |     |          |
| Ann Arbor stage       | .125     | 2.5 | 0.8–7.7  | .002     | 4.5 | 1.7–11.5 |
| Lymphadenopathy       | .208     | 2.1 | 0.7–6.6  | .005     | 3.9 | 1.5–10.0 |
| Elevated LDH level    | .004     | 4.9 | 1.7–14.2 | .032     | 2.8 | 1.1–7.1  |
| Ki-67 ≥70%            | .013     | 4.3 | 1.4–13.7 | .172     | 2.1 | 0.7–6.1  |
| Local invasiveness    | .358     | 2.0 | 0.4–9.2  | .095     | 2.9 | 0.8–10.2 |
| Multivariate analysis |          |     |          |          |     |          |
| Ann Arbor stage       |          |     |          | .001     | 4.8 | 1.9–12.2 |
| Ki-67 ≥70%            | .004     | 5.6 | 1.8–17.6 |          |     |          |

Abbreviations: CI, confidence interval; HR, hazard ratio; LDH, lactate dehydrogenase; OS, overall survival; PFS, progression-free survival.

**Table 5.** Comparison of prospective phase II trials for stage I/II natural killer/T-cell lymphoma, nasal type

| Characteristics               | No use of L-asp                                                                                                                                   |                                                                                                                                 |                                                                                                                                    | Use of L-asp                                                                                                                                                      |                                                                                                                   |
|-------------------------------|---------------------------------------------------------------------------------------------------------------------------------------------------|---------------------------------------------------------------------------------------------------------------------------------|------------------------------------------------------------------------------------------------------------------------------------|-------------------------------------------------------------------------------------------------------------------------------------------------------------------|-------------------------------------------------------------------------------------------------------------------|
|                               | Present study                                                                                                                                     | DEVIC [4]                                                                                                                       | VIPD [5]                                                                                                                           | CHOP + L-asp [10]                                                                                                                                                 | GELOX [12]                                                                                                        |
| Patients, <i>n</i>            | 44                                                                                                                                                | 33                                                                                                                              | 30                                                                                                                                 | 38 (7 stage III/IV)                                                                                                                                               | 27                                                                                                                |
| Chemotherapy doses, schedules | I: 1.5 g/m <sup>2</sup> , days 1–3; M: 30 mg/m <sup>2</sup> , days 3, 10; E: 100 mg/m <sup>2</sup> , days 1–3; P: 60 mg/m <sup>2</sup> , days 1–5 | D: 40 mg, days 1–3; E: 67 mg/m <sup>2</sup> , days 1–3; I: 1.0 g/m <sup>2</sup> , days 1–3; CARB: 200 mg/m <sup>2</sup> , day 1 | D: 40 mg, days 1–4; E: 100 mg/m <sup>2</sup> , days 1–3; I: 1.2 g/m <sup>2</sup> , days 1–3; CDDP: 33 mg/m <sup>2</sup> , days 1–3 | C: 750 mg/m <sup>2</sup> , day 1; H: 50 mg/m <sup>2</sup> , day 1; V: 1.4 mg/m <sup>2</sup> , day 1; P: 10 mg, days 1–8; L-asp: 6,000 U/m <sup>2</sup> , days 2–8 | G: 1,000 mg/m <sup>2</sup> , days 1–8; O: 130 mg/m <sup>2</sup> , day 1; L-asp: 6,000 U/m <sup>2</sup> , days 1–7 |
| Planned cycles                | 6                                                                                                                                                 | 3                                                                                                                               | 3                                                                                                                                  | 6–8                                                                                                                                                               | 6                                                                                                                 |
| Radiotherapy                  | Sequential                                                                                                                                        | Upfront concurrent                                                                                                              | Upfront concurrent                                                                                                                 | Sequential                                                                                                                                                        | Sequential                                                                                                        |
| ORR/CR rates, <i>n</i> (%)    | 73 (27)                                                                                                                                           | 81 (77)                                                                                                                         | 100 (73)                                                                                                                           | 84.2 (81.6)                                                                                                                                                       | 96.3 (74.1)                                                                                                       |
| 2-year OS, %                  | 56                                                                                                                                                | 78                                                                                                                              | 85                                                                                                                                 | 80.1                                                                                                                                                              | 86                                                                                                                |
| 2-year PFS, %                 | 66                                                                                                                                                | 67                                                                                                                              | 86                                                                                                                                 | 81                                                                                                                                                                | 86                                                                                                                |

Abbreviations: C, cyclophosphamide; CARB, carboplatin; CDDP, cisplatin; CHOP, cyclophosphamide, doxorubicin, vincristine, and prednisone; CR, complete response; D, dexamethasone; E, etoposide; G, gemcitabine; GELOX, gemcitabine plus oxaliplatin and L-asp; H, doxorubicin; I, ifosfamide; L-asp, L-asparaginase; M, methotrexate; O, oxaliplatin; ORR, overall response rate; OS, overall survival; P, prednisolone; PFS, progression-free survival; V, vincristine.

[Click here](#) to access other published clinical trials.
